# Supplementary material for: Towards a more complete quantification of the global carbon cycle
Source: Copernicus journal article supplement (doi:10.5194/bg-16-831-2019), 2019-02-14
Supplement: Supplementary file 2 [file bg-16-831-2019-supplement.zip]

Archive with 3 entries (3 files):
- Global_Carbon_Budget_Kirschbaum(data used).xlsx
- bg-16-831-2019-supplement-title-page.pdf
- bg-2018-436-supplement-version4.pdf
