# Supplementary material for: Towards a more complete quantification of the global carbon cycle
Source: Copernicus journal article supplement (doi:10.5194/bg-16-831-2019), 2019-02-14
Supplement: Supplementary file 2 [file bg-16-831-2019-supplement.zip › bg-16-831-2019-supplement-title-page.pdf]

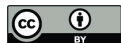

## *Supplement of*

# **Towards a more complete quantification of the global carbon cycle**

**Miko U. F. Kirschbaum et al.**

*Correspondence to:* Miko U. F. Kirschbaum ([kirschbaumm@landcareresearch.co.nz](mailto:kirschbaumm@landcareresearch.co.nz))

- [bg-16-831-2019-supplement-title-page.pdf](#)
- [Global\\_Carbon\\_Budget\\_Kirschbaum\(data used\).xlsx](#)
- [bg-2018-436-supplement-version4.pdf](#)

The copyright of individual parts of the supplement might differ from the CC BY 4.0 License.
