# Supplementary material for: Towards a more complete quantification of the global carbon cycle
Source: Copernicus journal article supplement (doi:10.5194/bg-16-831-2019), 2019-02-14
Supplement: Supplementary file 2 [file bg-16-831-2019-supplement.zip › Global_Carbon_Budget_Kirschbaum(data used).xlsx]

## Sheet: Figure 3
							Figure 3 data
	Wood products	Bitumen	Plastic	Cement carbonation	Total	Bitumen + plastic + cement
	MtC yr-1	MtC yr-1	MtC yr-1	MtC yr-1	MtC yr-1	GtC yr-1
1900	16.368	0.22	0	0	16.588	0.00022
1906	18.137	0.209	0	0	18.346	0.000209
1913	20.362	0.191	0	0	20.553	0.000191
1920	22.587	0.18	0.1	0	22.867	0.00028
1925	23.695	0.179	0.174	0	24.048	0.000353
1932	25.697	1.062	0.383	2	29.142	0.003445
1933	26.2	1.275	0.38	2	29.855	0.003655
1938	26.803	1.94	0.368	5	34.111	0.007308
1939	27	2.607	0.36	4	33.967	0.006967
1942	27.3	3.722	0.35	4	35.372	0.008072
1944	27.688	4.613	0.35	3	35.651	0.007963
1946	28	5.506	0.352	3	36.858	0.008858
1947	28.352	6.399	0.4	4	39.151	0.010799
1950	28.344	8.9	0.5	5	42.744	0.0144
1952	29	11.094	0.52	8	48.614	0.019614
1953	29.7	11.091	0.54	8	49.331	0.019631
1955	30.5	12.879	0.56	10	53.939	0.023439
1956	31.023	15.342	1	11	58.365	0.027342
1957	32.8	15.339	1.675	12	61.814	0.029014
1959	34.378	17.799	1.895	14	68.072	0.033694
1960	35	19	3.46	15	72.46	0.03746
1961	35.493	20.035	4.801	16	76.329	0.040836
1962	42.434	23.8395	6.2535	17	89.527	0.047093
1963	37.729	24.735	4.798	19	86.262	0.048533
1964	43.552	26.1895	6.252	21	96.9935	0.0534415
1965	49.375	27.644	7.706	22	106.725	0.05735
1966	58.111	28.538	8.77	23	118.419	0.060308
1967	62.813	31	9.719	25	128.532	0.065719
1968	60.347	33.014	12.852	26	132.213	0.071866
1969	65.274	36.821	15.09	29	146.185	0.080911
1970	68.409	37.938	15.1	29	150.447	0.082038
1971	67.51	42.193	15.086	30	154.789	0.087279
1972	70	45.104	18.668	33	166.772	0.096772
1973	72.436	46.445	22.252	35	176.133	0.103697
1974	79.603	43.307	22.921	38	183.831	0.104228
1975	64.14	39.721	17.767	38	159.628	0.095488
1976	55.178	41.958	20.453	39	156.589	0.101411
1977	61.897	43.5	23.81	42	171.207	0.10931
1978	69.514	45.092	25.7	46	186.306	0.116792
1979	74.216	46.21	27.616	48	196.042	0.121826
1980	75.109	41.951	25.597	49	191.657	0.116548
1981	68.609	38.141	23.578	50	180.328	0.111719
1982	63	36.794	26.04	51	176.834	0.113834
1983	59.42	39.703	27.6	53	179.723	0.120303
1984	66.587	40.9	29.397	55	191.884	0.125297
1985	73.754	42.164	31.859	57	204.777	0.131023
1986	76.44	44.402	32.528	58	211.37	0.13493
1987	82.711	45.6	35.663	61	224.974	0.142263
1988	88.535	46.864	38.349	65	238.748	0.150213
1989	90.772	45.741	39.4	64	239.913	0.149141
1990	86.288	49.996	40.362	63	239.646	0.153358
1991	76.204	53.803	42.599	67	239.606	0.163402
1992	65.225	56.264	43.4	71	235.889	0.170664
1993	55.366	56.261	44.388	76	232.015	0.176649
1994	49.987	57.3	47.748	80	235.035	0.185048
1995	49.088	58.499	51.554	87	246.141	0.197053
1996	49.534	57.152	54.912	89	250.598	0.201064
1997	46.62	60.51	60	95	262.13	0.21551
1998	61.628	63.42	65.436	96	286.484	0.224856
1999	43.704	63.9	68.796	97	273.4	0.229696
2000	52.887	64.312	71.93	102	291.129	0.238242
2001	55.349	61.846	70.583	110	297.778	0.242429
2002	46.834	60.723	74.166	114	295.723	0.248889
2003	53.776	65.649	77.524	121	317.949	0.264173
2004	62.512	67.8	81.78	131	343.092	0.28058
2005	76.175	70.35	84.688	139	370.213	0.294038
2006	81.774	70.1	88.496	152	392.37	0.310596
2007	85.581	69.899	93.871	165	414.351	0.32877
2008	85.13	66.536	79.978	172	403.644	0.318514
2009	78.2344	68.937	85.7626	185	417.934	0.3397
2010	81.3789	69.1644	86.5591	197	434.102	0.352724
2011	82.4197	68.9273	86.9333	208	446.28	0.363861
2012	82.5488	68.6927	86.6208	223	460.862	0.378314
2013	81.9423	68.4515	85.1708	243	478.565	0.396622

## Sheet: Figure 4
							Figure 4 data
	IPCC default values		Percent of municipal waste
											Year	Wood products	Plastic	Others	Bitumen	Total	Landfill storage
		Amount	paper/ cardboard	wood	textiles	rubber/ leather	Plastic					MtC yr-1	MtC yr-1	MtC yr-1	MtC yr-1	MtC yr-1	GtC yr-1
		t cp-1 yr-1	%	%	%	%	%				1900	69	0	10.6707	0	79.6707	0.0149587
	Eastern Asia	0.37	18.8	3.5	3.5	1	14.3				1901	69.72	0	10.7821	0	80.5021	0.0151147
	South Central Asia	0.21	11.3	7.9	2.5	0.8	6.4				1902	70.44	0	10.8934	0	81.3334	0.0152708
	South-Eastern Asia	0.27	12.9	9.9	2.7	0.9	7.2				1903	71.16	0	11.0048	0	82.1648	0.0154269
	West Asia/ middle east		18	9.8	2.9	0.6	6.3				1904	71.88	0	11.1161	0	82.9961	0.015583
	East Africa	0.29	7.7	7	1.7	1.1	5.5				1905	72.6	0	11.2274	0	83.8274	0.0157391
	Middle Africa	0.29	16.8	6.5	2.5		4.5				1906	73.32	0	11.3388	0	84.6588	0.0158952
	North Africa	0.29	16.5	2	2.5		4.5				1907	74.04	0	11.4501	0	85.4901	0.0160513
	Southern Africa	0.29	25	15							1908	74.76	0	11.5615	0	86.3215	0.0162074
	Western Africa	0.29	9.8	4.4	1		3				1909	75.48	0	11.6728	0	87.1528	0.0163635
	Eastern Europe	0.38	21.8	7.5	4.7	1.4	6.2				1910	76.2	0	11.7842	0	87.9842	0.0165196
	Northern Europe	0.64	30.6	10	2		13				1911	76.92	0	11.8955	0	88.8155	0.0166757
	Southern Europe	0.52	17	10.6							1912	77.64	0	12.0069	0	89.6469	0.0168317
	Western Europe	0.56	27.5	11							1913	78.36	0	12.1182	0	90.4782	0.0169878
	Caribbean	0.49	17	2.4	5.1	1.9	9.9				1914	79.08	0	12.2296	0	91.3096	0.0171439
	Central America	0.21	13.7	13.5	2.6	1.8	6.7				1915	79.8	0	12.3409	0	92.1409	0.0173
	South America	0.26	17.1	4.7	2.6	0.7	10.8				1916	80.52	0	12.4523	0	92.9723	0.0174561
	North America	0.65	23.2	2.4	3.9	1.4	8.5				1917	81.24	0	12.5636	0	93.8036	0.0176122
	Oceania		6	2.5							1918	81.96	0	12.6749	0	94.6349	0.0177683
	Australian/ NZ	0.69	30	24							1919	82.68	0	12.7863	0	95.4663	0.0179244
								ratio (textile+rubber)/(wood prod+paper)			1920	83.4	0	12.8976	0	96.2976	0.0180805
	Global average	0.394118	17.9316	8.13684	2.87143	1.16	7.62857		0.154648		1921	84.12	0	13.009	0	97.129	0.0182366
											1922	84.84	0	13.1203	0	97.9603	0.0183926
	Estimated landfill carbon storage (from Table 1 - main paper)						88	MtC yr-1	0.187756		1923	85.56	0	13.2317	0	98.7917	0.0185487
											1924	86.28	0	13.343	0	99.623	0.0187048
											1925	87	0	13.4544	0	100.454	0.0188609
											1926	87.5	0	13.5317	0	101.032	0.0189693
											1927	88	0	13.609	0	101.609	0.0190777
											1928	88.5	0	13.6863	0	102.186	0.0191861
											1929	89	0	13.7637	0	102.764	0.0192945
											1930	89.5	0	13.841	0	103.341	0.0194029
											1931	90	0	13.9183	0	103.918	0.0195113
											1932	90.5	0	13.9956	0	104.496	0.0196197
											1933	91	0	14.073	0	105.073	0.0197281
											1934	91.5	0	14.1503	0	105.65	0.0198365
											1935	92	0	14.2276	0	106.228	0.0199449
											1936	92.5	0	14.3049	0	106.805	0.0200533
											1937	93	0	14.3823	0	107.382	0.0201617
											1938	93.5	0	14.4596	0	107.96	0.0202701
											1939	94	0	14.5369	0	108.537	0.0203785
											1940	94.5	2.81818	14.6142	0	111.932	0.021016
											1941	95	3	14.6916	0	112.692	0.0211585
											1942	96.5	3.25	14.9235	0	114.674	0.0215306
											1943	98	3.5	15.1555	0	116.656	0.0219028
											1944	99.5	3.75	15.3875	0	118.637	0.0222749
											1945	101	4	15.6194	0	120.619	0.022647
											1946	102.5	4.03846	15.8514	0	122.39	0.0229794
											1947	104	4.07692	16.0834	0	124.16	0.0233119
											1948	105.5	4.11538	16.3154	0	125.931	0.0236443
											1949	107	4.15385	16.5473	0	127.701	0.0239767
											1950	108	4.69231	16.702	0	129.394	0.0242946
											1951	109	5.23077	16.8566	0	131.087	0.0246125
											1952	110	5.76923	17.0113	0	132.781	0.0249303
											1953	111	6.30769	17.1659	0	134.474	0.0252482
											1954	112	6.84615	17.3206	0	136.167	0.0255661
											1955	113	7.38462	17.4752	0	137.86	0.025884
											1956	114	7.92308	17.6299	0	139.553	0.0262019
											1957	114.75	8.71154	17.7459	0	141.207	0.0265125
											1958	115.5	9.5	17.8618	0	142.862	0.0268232
											1959	116.25	11.6071	17.9778	0	145.835	0.0273814
											1960	117	13.7143	18.0938	0	148.808	0.0279396
											1961	119.458	13.9048	18.6823	0.208333	152.254	0.0285866
											1962	121.917	14.0952	19.2708	0.416667	155.699	0.0292335
											1963	124.375	14.2857	19.8593	0.625	159.145	0.0298804
											1964	131.167	10.1429	21.118	0.833333	163.261	0.0306532
											1965	133.958	10	21.7581	1.04167	166.758	0.0313098
											1966	136.75	11.1667	22.3981	1.25	171.565	0.0322123
											1967	140.042	11.8333	23.1155	1.45833	176.449	0.0331293
											1968	143.333	12.5	23.8329	1.66667	181.333	0.0340463
											1969	145.125	14.6667	24.3183	1.875	185.985	0.0349198
											1970	149.417	14.3333	25.1903	2.08333	191.024	0.0358658
											1971	153.708	14	26.0623	2.29167	196.062	0.0368119
											1972	159	14.5	27.089	2.5	203.089	0.0381312
											1973	164.292	15	28.1157	2.70833	210.116	0.0394505
											1974	145.083	20	25.3535	2.91667	193.354	0.0363033
											1975	162.875	21.5	28.3133	3.125	215.813	0.0405203
											1976	181.667	22	31.4277	3.33333	238.428	0.0447662
											1977	169.458	31	29.7481	3.54167	233.748	0.0438876
											1978	170.25	27	30.0788	3.75	231.079	0.0433864
											1979	171.042	27.5	30.4096	3.95833	232.91	0.0437302
											1980	172.833	27	30.895	4.16667	234.895	0.044103
											1981	174.625	28	31.3804	4.375	238.38	0.0447574
											1982	176.417	29	31.8658	4.58333	241.866	0.0454118
											1983	190.208	34	34.207	4.79167	263.207	0.0494187
											1984	192.5	33.5	34.7697	5	265.77	0.0498999
											1985	194.792	33	35.3325	5.20833	268.332	0.050381
											1986	207.583	34	37.519	5.41667	284.519	0.0534202
											1987	210.875	35.5	38.2364	5.625	290.236	0.0544936
											1988	214.167	37	38.9538	5.83333	295.954	0.0555671
											1989	214.958	40.5	39.2845	6.04167	300.785	0.0564741
											1990	215.75	44	39.6153	6.25	305.615	0.0573811
											1991	210.542	49.5	39.0182	6.45833	305.518	0.0573629
											1992	219.333	41	40.5861	6.66667	307.586	0.0577512
											1993	228.125	48	42.1541	6.875	325.154	0.0610496
											1994	239.917	56	44.186	7.08333	347.186	0.0651863
											1995	242.208	59	44.7487	7.29167	353.249	0.0663246
											1996	244.5	62	45.3114	7.5	359.311	0.0674629
											1997	271.292	57	49.663	7.70833	385.663	0.0724106
											1998	241.083	70	45.1997	7.91667	364.2	0.0683807
											1999	267.875	62	49.5513	8.125	387.551	0.0727651
											2000	266.167	72	49.4955	8.33333	395.995	0.0743505
											2001	264.458	82	49.4396	8.54167	404.44	0.075936
											2002	284.25	85	52.7087	8.75	430.709	0.0808682
											2003	288.542	89.5	53.5807	8.95833	440.581	0.0827217
											2004	292.833	94	54.4527	9.16667	450.453	0.0845752
											2005	298.125	104.5	55.4794	9.375	467.479	0.0877721
											2006	303.417	106	56.5061	9.58333	475.506	0.0892792
											2007	296.208	120	55.5997	9.79167	481.6	0.0904233
											2008	289	115	54.6933	10	468.693	0.088
											2009	295.917	107.9	55.3462	9.58333	468.746	0.0880099
											2010	296.533	110.68	55.5249	9.66667	472.405	0.0886969
											2011	296.215	111.916	55.5341	9.725	473.39	0.0888818

## Sheet: Figure 8
							Figure 8 data
	Data in green are from Le Quere et al. (2018)					Plastic, bitumen, and	Landfill		Time-fixed adjustments	1.15	0	-1.17802		5.8013e-10
	Fossil fuels	Process models	land sink	budget imbalance	Residual sink	and cement carbonation	disposal	ΔBphys	Dust	0.05	5	3.82198		Difference between red line and actual data
	GtC yr-1	GtC yr-1	GtC yr-1	GtC yr-1	GtC yr-1	GtC yr-1	GtC yr-1	GtC yr-1	VOCs	0.05				GtC yr-1
1959	2.454	0.981536	0.981536	0.43881	1.42035	0.033694	0.0273814	0.319946	River organic	0.2				-0.516426
1960	2.569	1.81135	1.81135	0.113205	1.92455	0.03746	0.0279396	0.825015	River particulate	0.25				-0.191683
1961	2.58	1.0239	1.0239	0.826521	1.85042	0.040836	0.0285866	0.747352	Inland deposition	0.6				-0.901472
1962	2.686	1.61936	1.61936	0.660637	2.27999	0.047093	0.0292335	1.17481						-0.733465
1963	2.833	1.02889	1.02889	1.18995	2.21884	0.048533	0.0298804	1.11819	Non-oxidation term	0.0451				-1.26732
1964	2.995	1.84346	1.84346	0.47191	2.31537	0.0534415	0.0306532	1.21635						-0.550905
1965	3.13	0.490388	0.490388	0.499196	0.989585	0.05735	0.0313098	-0.107912						-0.579715
1966	3.288	1.40388	1.40388	-0.308036	1.09585	0.060308	0.0322123	0.0016141						0.224252
1967	3.393	1.88192	1.88192	0.527103	2.40902	0.065719	0.0331293	1.3132						-0.609295
1968	3.566	2.58677	2.58677	-0.854618	1.73215	0.071866	0.0340463	0.637065						0.771688
1969	3.78	0.669839	0.669839	0.55027	1.22011	0.080911	0.0349198	0.124756						-0.632933
1970	4.053	0.686956	0.686956	1.23611	1.92307	0.082038	0.0358658	0.837954						-1.32901
1971	4.208	2.64774	2.64774	0.164825	2.81256	0.087279	0.0368119	1.72825						-0.258531
1972	4.376	1.25033	1.25033	-0.0974378	1.15289	0.096772	0.0381312	0.0653437						0.00696761
1973	4.614	2.03194	2.03194	-0.63825	1.39369	0.103697	0.0394505	0.308636						0.54529
1974	4.623	4.48068	4.48068	-1.41123	3.06945	0.104228	0.0363033	1.98742						1.31525
1975	4.596	2.75342	2.75342	-0.922682	1.83073	0.095488	0.0405203	0.752004						0.823395
1976	4.864	3.17776	3.17776	-0.618644	2.55911	0.101411	0.0447662	1.4823						0.517439
1977	5.016	1.80183	1.80183	-1.16677	0.635057	0.10931	0.0438876	-0.441919						1.06573
1978	5.074	3.14486	3.14486	-1.2106	1.93425	0.116792	0.0433864	0.852911						1.11393
1979	5.357	1.56048	1.56048	-1.02634	0.534142	0.121826	0.0437302	-0.539813						0.922277
1980	5.301	0.767634	0.767634	0.378731	1.14636	0.116548	0.044103	0.0747888						-0.485171
1981	5.138	2.69612	2.69612	-0.546144	2.14998	0.111719	0.0447574	1.07523						0.442881
1982	5.094	1.6031	1.6031	0.777674	2.38078	0.113834	0.0454118	1.30127						-0.876184
1983	5.075	0.326095	0.326095	0.141534	0.467629	0.120303	0.0494187	-0.62321						-0.228711
1984	5.258	2.90231	2.90231	-0.852284	2.05003	0.125297	0.0498999	0.961966						0.76233
1985	5.417	2.72803	2.72803	-1.32297	1.40506	0.131023	0.050381	0.317965						1.23205
1986	5.583	2.27033	2.27033	0.574968	2.84529	0.13493	0.0534202	1.75874						-0.666427
1987	5.725	0.472683	0.472683	-0.966136	-0.493453	0.142263	0.0544936	-1.58201						0.876679
1988	5.936	2.19192	2.19192	-1.4916	0.700327	0.150213	0.0555671	-0.387739						1.40165
1989	6.066	3.66616	3.66616	-0.975565	2.69059	0.149141	0.0564741	1.60855						0.879588
1990	6.08624	2.3531	2.3531	0.697184	3.05028	0.153358	0.0573811	1.96403						-0.78895
1991	6.16585	2.09503	2.09503	1.9136	4.00863	0.163402	0.0573629	2.91594						-1.99893
1992	6.11533	2.2555	2.2555	1.57153	3.82704	0.170664	0.0577512	2.72442						-1.64693
1993	6.12418	3.08027	3.08027	-0.309421	2.77085	0.176649	0.0610496	1.65935						0.242903
1994	6.22596	1.56606	1.56606	0.444109	2.01017	0.185048	0.0651863	0.890728						-0.502682
1995	6.32326	1.86756	1.86756	-0.257086	1.61047	0.197053	0.0663246	0.482274						0.207269
1996	6.47511	3.40915	3.40915	0.218548	3.6277	0.201064	0.0674629	2.5012						-0.270064
1997	6.56886	3.01849	3.01849	-0.792164	2.22632	0.21551	0.0724106	1.08466						0.755813
1998	6.59295	1.65421	1.65421	-1.90725	-0.253039	0.224856	0.0683807	-1.39893						1.87512
1999	6.62355	3.57666	3.57666	-0.675673	2.90098	0.229696	0.0727651	1.74724						0.651396
2000	6.7851	3.98623	3.98623	-0.476499	3.50973	0.238242	0.0743505	2.35314						0.455068
2001	6.97411	2.35375	2.35375	0.0471623	2.40091	0.242429	0.075936	1.24708						-0.0713455
2002	7.07364	0.880367	0.880367	0.331216	1.21158	0.248889	0.0808682	0.0508467						-0.348496
2003	7.47348	2.49116	2.49116	-0.703065	1.78809	0.264173	0.0827217	0.62825						0.68489
2004	7.85486	3.75483	3.75483	-0.0489896	3.70584	0.28058	0.0845752	2.54494						0.0318748
2005	8.23338	2.03669	2.03669	-0.0787026	1.95799	0.294038	0.0877721	0.797501						0.0611715
2006	8.52611	3.36165	3.36165	0.243342	3.605	0.310596	0.0892792	2.43965						-0.25601
2007	8.77555	3.17638	3.17638	-0.324766	2.85161	0.32877	0.0904233	1.6782						0.320166
2008	8.96383	3.99438	3.99438	-0.078036	3.91634	0.318514	0.088	2.7641						0.0522653
2009	8.87187	3.09537	3.09537	1.46509	4.56046	0.3397	0.0880099	3.38287						-1.46551
2010	9.20741	3.04328	3.04328	0.112868	3.15615	0.352724	0.0886969	1.97999						-0.114718
2011	9.54342	3.97971	3.97971	0.942763	4.92248	0.363861	0.0888818	3.75014						-0.948445
